# Supplementary material for: Effectiveness of Pre-Hospital Tourniquet in Emergency Patients with Major Trauma and Uncontrolled Haemorrhage: A Systematic Review and Meta-Analysis
Source: MDPI journal article supplement (doi:10.3390/ijerph182312861), 2021-12-06
Supplement: s1 [file s1]

## Supplement A. PICO Question and Search strategy

**Review question: Is the use of pneumatic or mechanical tourniquets clinically and cost effective in improving outcomes in patients with haemorrhage in major trauma?**

### SEARCH STRATEGIES \_CLINICAL QUESTION CQ4

#### 1. MEDLINE SEARCH TERMS

**Limitation of language: English, Spanish, Italian, French, German**

**No other filters**

#### POPULATION

##### Medline search terms

|    |                                                                                                                                                                                                       |
|----|-------------------------------------------------------------------------------------------------------------------------------------------------------------------------------------------------------|
| 1. | (trauma* or polytrauma*).ti,ab.                                                                                                                                                                       |
| 2. | ((serious* or severe* or major or life threaten*) adj3 (accident* or injur* or fall*)).ti,ab.                                                                                                         |
| 3. | multiple trauma/                                                                                                                                                                                      |
| 4. | wounds, gunshot/ or wounds, stab/ or accidents, traffic/ or accidental falls/ or blast injuries/ or accidents, aviation/                                                                              |
| 5. | ((motor* or motorbike* or vehicle* or road or traffic or car or cars or cycling or bicycle* or automobile* or bike* or head on or pile up) adj3 (accident* or crash* or collision* or smash*)).ti,ab. |
| 6. | (mvas or mva or rtas or rta).ti,ab.                                                                                                                                                                   |
| 7. | (stabbed or stabbing or stab or gunshot* or gun or gunfire or firearm* or bullet* or knife* or knives or dagger).ti,ab.                                                                               |
| 8. | or/1-7                                                                                                                                                                                                |

## INTERVENTION

### Medline search terms

|    |                    |
|----|--------------------|
| 1. | tourniquets/       |
| 2. | tourniquet*.ti,ab. |
| 3. | or/1-2             |

### Excluded study designs and publication types

The following study designs and publication types were removed from retrieved results using **the NOT** operator. Added to search with operator NOT .The following search terms:

### Medline search terms

|     |                                                |
|-----|------------------------------------------------|
| 1.  | letter/                                        |
| 2.  | editorial/                                     |
| 3.  | news/                                          |
| 4.  | exp historical article/                        |
| 5.  | anecdotes as topic/                            |
| 6.  | comment/                                       |
| 7.  | case report/                                   |
| 8.  | (letter or comment*).ti.                       |
| 9.  | or/1-8                                         |
| 10. | randomized controlled trial/ or random*.ti,ab. |
| 11. | 9 not 10                                       |

|     |                                    |
|-----|------------------------------------|
| 12. | animals/ not humans/               |
| 13. | exp animals, laboratory/           |
| 14. | exp animal experimentation/        |
| 15. | exp models, animal/                |
| 16. | exp rodentia/                      |
| 17. | (rat or rats or mouse or mice).ti. |
| 18. | or/11-17                           |

## 2. EMBASE SEARCH TERMS

**Limitation of language: english, spanish, Italian, German, French**  
**No other filters.**

### POPULATION

**major trauma population**

### Embase search terms

|    |                                                                                                                                                                                                       |
|----|-------------------------------------------------------------------------------------------------------------------------------------------------------------------------------------------------------|
| 1. | (trauma* or polytrauma*).ti,ab.                                                                                                                                                                       |
| 2. | ((serious* or severe* or major or life threaten*) adj3 (accident* or injur* or fall*)).ti,ab.                                                                                                         |
| 3. | multiple trauma/                                                                                                                                                                                      |
| 4. | gunshot injury/ or stab wound/ or traffic accident/ or falling/ or blast injury/ or aircraft accident/                                                                                                |
| 5. | ((motor* or motorbike* or vehicle* or road or traffic or car or cars or cycling or bicycle* or automobile* or bike* or head on or pile up) adj3 (accident* or crash* or collision* or smash*)).ti,ab. |

|    |                                                                                                                         |
|----|-------------------------------------------------------------------------------------------------------------------------|
| 6. | (mvas or mva or rtas or rta).ti,ab.                                                                                     |
| 7. | (stabbed or stabbing or stab or gunshot* or gun or gunfire or firearm* or bullet* or knife* or knives or dagger).ti,ab. |
| 8. | or/1-7                                                                                                                  |

## INTERVENTION

### Embase search terms

|    |                    |
|----|--------------------|
| 1. | exp tourniquet/    |
| 2. | tourniquet*.ti,ab. |
| 3. | or/1-2             |

### Excluded study designs and publication types

The following study designs and publication types were removed from retrieved results using **the NOT** operator. Added to search with operator NOT , the following search terms:

### Embase search terms

|    |                                                |
|----|------------------------------------------------|
| 1. | letter.pt. or letter/                          |
| 2. | note.pt.                                       |
| 3. | editorial.pt.                                  |
| 4. | case report/ or case study/                    |
| 5. | (letter or comment*).ti.                       |
| 6. | or/1-5                                         |
| 7. | randomized controlled trial/ or random*.ti,ab. |

|     |                                    |
|-----|------------------------------------|
| 8.  | 6 not 7                            |
| 9.  | animal/ not human/                 |
| 10. | nonhuman/                          |
| 11. | exp animal experiment/             |
| 12. | exp experimental animal/           |
| 13. | animal model/                      |
| 14. | exp rodent/                        |
| 15. | (rat or rats or mouse or mice).ti. |
| 16. | or/8-15                            |

### 3. COCHRANE SEARCH TERMS

**Limitation of language: English, Spanish, Italian, French, German**

**No other filters**

#### POPULATION

##### Cochrane search terms

|     |                                                                              |
|-----|------------------------------------------------------------------------------|
| #1. | MeSH descriptor: [multiple trauma] this term only                            |
| #2. | (trauma* or polytrauma*):ti,ab                                               |
| #3. | ((serious* or severe* or major) near/3 (accident* or injur* or fall*)):ti,ab |
| #4. | MeSH descriptor: [wounds, gunshot] this term only                            |
| #5. | MeSH descriptor: [wounds, stab] this term only                               |
| #6. | MeSH descriptor: [accidents, traffic] this term only                         |
| #7. | MeSH descriptor: [accidental falls] this term only                           |
| #8. | MeSH descriptor: [blast injuries] this term only                             |

|      |                                                                                                                                                                                  |
|------|----------------------------------------------------------------------------------------------------------------------------------------------------------------------------------|
| #9.  | MeSH descriptor: [accidents, aviation] this term only                                                                                                                            |
| #10. | ((motor* or motorbike* or vehicle* or road or traffic or car or cars or cycling or bicycle* or automobile* or bike*) near/3 (accident* or crash* or collision* or smash*)):ti,ab |
| #11. | (mvas or mva or rtas or rta):ti,ab                                                                                                                                               |
| #12. | (stabbed or stabbing or stab or gunshot or gun or gunfire or firearm* or bullet or knife* or knives or dagger or shot):ti,ab                                                     |
| #13. | {or #1-#12}                                                                                                                                                                      |

## INTERVENTION

### Cochrane search terms

|     |                                               |
|-----|-----------------------------------------------|
| #1. | MeSH descriptor: [tourniquets] this term only |
| #2. | tourniquet*:ti,ab                             |
| #3. | {or #1-#2}                                    |

## Supplement B. List of excluded studies with reasons

### Studies excluded from the clinical review (UPDATE 2015-2020)

| N° | REFERENCES                                                                                                                                                                                                                                                                  | REASON OF EXCLUSION |
|----|-----------------------------------------------------------------------------------------------------------------------------------------------------------------------------------------------------------------------------------------------------------------------------|---------------------|
| 1  | Zietlow JM, Zietlow SP, Morris DS, Berns KS, Jenkins DH. Prehospital Use of Hemostatic Bandages and Tourniquets: Translation From Military Experience to Implementation in Civilian Trauma Care. <i>J SpecOperMed</i> . 2015;15(2):48–53                                    | OUT OF SCOPE        |
| 2  | Shackelford SA, Del Junco DJ, Powell-Dunford N, et al. Association of Prehospital Blood Product Transfusion During Medical Evacuation of Combat Casualties in Afghanistan With Acute and 30-Day Survival. <i>JAMA</i> . 2017;318(16):1581–1591. doi:10.1001/jama.2017.15097 | POPULATION          |
| 3  | Schauer SG, Naylor JF, April MD, et al. The Prehospital Trauma Registry Experience With Intraosseous Access. <i>J SpecOperMed</i> . 2019;19(1):52–55.                                                                                                                       | NOT AVAILABLE       |
| 4  | Schauer SG, April MD, Naylor JF, et al. Prehospital Application of Hemostatic Agents in Iraq and Afghanistan. <i>PrehospEmerg Care</i> . 2018;22(5):614–623. doi:10.1080/10903127.2017.1423140                                                                              | POPULATION          |
| 5  | Mawhinney AC, Kirk SJ. A systematic review of the use of tourniquets and topical haemostatic agents in conflicts in Afghanistan and Iraq. <i>J R NavMedServ</i> . 2015;101(2):147–154.                                                                                      | NOT AVAILABLE       |
| 6  | Duignan KM, Lamb LC, DiFiori MM, Quinlavin J, Feeney JM. Tourniquet use in the prehospital setting: Are they being used appropriately?. <i>Am J DisasterMed</i> . 2018;13(1):37–43. doi:10.5055/ajdm.2018.0286                                                              | NOT AVAILABLE       |
| 7  | Beaucreux C, Vivien B, Miles E, Ausset S, Pasquier P. Application of tourniquet in civilian trauma: Systematic review of the literature. <i>AnaesthCrit Care PainMed</i> . 2018;37(6):597–606.                                                                              | WRONG COMPARISON    |
| 9  | Kauvar DS, Dubick MA, Walters TJ, Kragh JF Jr. Systematic review of prehospital tourniquet use in civilian limb trauma. <i>J Trauma Acute Care Surg</i> . 2018;84(5):819–825.                                                                                               | WRONG COMPARISON    |

|    |                                                                                                                                                                                                                                                                                                                                   |              |
|----|-----------------------------------------------------------------------------------------------------------------------------------------------------------------------------------------------------------------------------------------------------------------------------------------------------------------------------------|--------------|
| 8  | Scerbo MH, Mumm JP, Gates K, et al. Safety and Appropriateness of Tourniquets in 105 Civilians. <i>PrehospEmerg Care</i> . 2016;20(6):712–722.                                                                                                                                                                                    | OUT OF SCOPE |
| 10 | vanOostendorp SE, Tan EC, Geeraedts LM Jr. Prehospital control of life-threatening truncal and junctional haemorrhage is the ultimate challenge in optimizing trauma care; a review of treatment options and their applicability in the civilian trauma setting. <i>Scand J Trauma ResuscEmergMed</i> . 2016;24(1):110            | POPULATION   |
| 12 | Hossfeld B, Lechner R, Josse F, et al. Prähospital Anwendung von Tourniquets bei lebensbedrohlichen Extremitätenblutungen : Eine systematische Übersichtsarbeit [Prehospital application of tourniquets for life-threatening extremity hemorrhage : Systematic review of literature]. <i>Unfallchirurg</i> . 2018;121(7):516–529. | OUT OF SCOPE |
| 13 | Meizoso JP, Valle EJ, Allen CJ, et al. Decreased mortality after prehospital interventions in severely injured trauma patients. <i>J Trauma Acute Care Surg</i> . 2015;79(2):227–231.                                                                                                                                             | POPULATION   |
| 14 | Schauer SG, April MD, Hill GJ, Naylor JF, Borgman MA, De Lorenzo RA. Prehospital Interventions Performed on Pediatric Trauma Patients in Iraq and Afghanistan. <i>PrehospEmerg Care</i> . 2018;22(5):624–629.                                                                                                                     | OUT OF SCOPE |
| 15 | El Sayed MJ, Tamim H, Mailhac A, Mann NC. Trends and Predictors of Limb Tourniquet Use by Civilian Emergency Medical Services in the United States. <i>PrehospEmerg Care</i> . 2017;21(1):54–62.                                                                                                                                  | INTERVENTION |
| 16 | Schroll R, Smith A, McSwain NE Jr, et al. A multi-institutional analysis of prehospital tourniquet use. <i>J Trauma Acute Care Surg</i> . 2015;79(1):10–14.                                                                                                                                                                       | POPULATION   |
| 17 | Inaba K, Siboni S, Resnick S, et al. Tourniquet use for civilian extremity trauma. <i>J Trauma Acute Care Surg</i> . 2015;79(2):232–333.                                                                                                                                                                                          | STUDY DESIGN |
| 18 | Leonard J, Zietlow J, Morris D, et al. A multi-institutional study of hemostatic gauze and tourniquets in rural civilian trauma. <i>J Trauma Acute Care Surg</i> . 2016;81(3):441–444.                                                                                                                                            | STUDY DESIGN |
| 19 | Schauer SG, April MD, Fisher AD, Cunningham CW, Gurney J. Junctional Tourniquet Use During Combat Operations in Afghanistan: The Prehospital Trauma Registry Experience. <i>J SpecOperMed</i> . 2018;18(2):71–74.                                                                                                                 | OUT OF SCOPE |



|    |                                                                                                                                                                       |              |
|----|-----------------------------------------------------------------------------------------------------------------------------------------------------------------------|--------------|
| 20 | Cantle PM, Hurley MJ, Swartz MD, Holcomb JB. Methods for Early Control of Abdominal Hemorrhage: An Assessment of Potential Benefit. J SpecOperMed. 2018;18(2):98–104. | OUT OF SCOPE |
|----|-----------------------------------------------------------------------------------------------------------------------------------------------------------------------|--------------|

## Supplement C. Internal validity

All studies show poor reporting of outcome data by not indicating the follow-up of the assessment.

| Cohort study           | Selection                                |                                     |                           | Comparability                                                            |                                                                 | Outcome               |                                                 | Judgement                        |               |
|------------------------|------------------------------------------|-------------------------------------|---------------------------|--------------------------------------------------------------------------|-----------------------------------------------------------------|-----------------------|-------------------------------------------------|----------------------------------|---------------|
|                        | Representativeness of the exposed cohort | Selection of the non exposed cohort | Ascertainment of exposure | Demonstration that outcome of interest was not present at start of study | Comparability of cohorts on the basis of the design or analysis | Assessment of outcome | Was follow-up long enough for outcomes to occur | Adequacy of follow up of cohorts | Total Quality |
| McNickle et al. (2019) |                                          | *                                   | *                         |                                                                          | *                                                               | *                     |                                                 |                                  | 4 Fair        |
| Scerbo et al. (2017)   | *                                        | *                                   | *                         |                                                                          | *                                                               | *                     | *                                               |                                  | 6 Good        |
| Smith et al. (2018)    | *                                        | *                                   | *                         |                                                                          | *                                                               | *                     | *                                               |                                  | 6 Good        |
| Teixeira et al. (2018) |                                          | *                                   | *                         |                                                                          | *                                                               | *                     | *                                               |                                  | 5 Good        |

§ Outcomes may have been influenced by time.

**Thresholds for converting the Newcastle-Ottawa scales to AHRQ standards (good, fair, and poor):**

Good quality: 3 or 4 stars in selection domain AND 1 or 2 stars in comparability domain AND 2 or 3 stars in outcome/exposure domain

Fair quality: 2 stars in selection domain AND 1 or 2 stars in comparability domain AND 2 or 3 stars in outcome/exposure domain

Poor quality: 0 (zero) or 1 star in selection domain OR 0 stars in comparability domain OR 0 or 1 stars in outcome/exposure domain

### Cohort studies

**Note:** A study can be awarded a maximum of one star for each numbered item within the Selection and Outcome categories. A maximum of two stars can be given for Comparability

### Selection

- 1) Representativeness of the exposed cohort
  - a) truly representative of the average population in the community \*
  - b) somewhat representative of the average population in the community \*
  - c) selected group of users eg nurses, volunteers
  - d) no description of the derivation of the cohort
- 2) Selection of the non exposed cohort
  - a) drawn from the same community as the exposed cohort \*

- b) drawn from a different source
  - c) no description of the derivation of the non exposed cohort
- 3) Ascertainment of exposure
  - a) secure record (eg surgical records) \*
  - b) structured interview ☒
  - c) written self report
  - d) no description
- 4) Demonstration that outcome of interest was not present at start of study
  - a) yes \*
  - b) no

#### **Comparability**

- 1) Comparability of cohorts on the basis of the design or analysis
  - a) study controls for the most important factor\*
  - b) study controls for any additional factor \*
  - c) no control for confounding performed

#### **Outcome**

- 1) Assessment of outcome
  - a) independent blind assessment \*
  - b) record linkage \*
  - c) self report
  - d) no description
- 2) Was follow-up long enough for outcomes to occur
  - a) yes (select an adequate follow up period for outcome of interest) \*
  - b) no
- 3) Adequacy of follow up of cohorts
  - a) complete follow up - all subjects accounted for \*
  - b) subjects lost to follow up unlikely to introduce bias - small number lost - >70 % follow up, or description provided of those lost) \*
  - c) follow up rate <70% and no description of those lost
  - d) no statement

## Supplement D. Summary of Findings using GRADE approach - Tables

| Certainty assessment |              |              |               |              |             |                      | № of patients |                                | Effect            |                   | Certainty | Importance |
|----------------------|--------------|--------------|---------------|--------------|-------------|----------------------|---------------|--------------------------------|-------------------|-------------------|-----------|------------|
| № of studies         | Study design | Risk of bias | Inconsistency | Indirectness | Imprecision | Other considerations | Tourniquets   | no tourniquets (adjusted data) | Relative (95% CI) | Absolute (95% CI) |           |            |

### Overall cause mortality (follow-up not reported)

|   |                       |                        |             |                      |                      |                        |               |               |                           |                                                  |                  |          |
|---|-----------------------|------------------------|-------------|----------------------|----------------------|------------------------|---------------|---------------|---------------------------|--------------------------------------------------|------------------|----------|
| 3 | Observational studies | serious <sup>a,b</sup> | not serious | serious <sup>c</sup> | serious <sup>d</sup> | suspected <sup>h</sup> | 22/448 (4.9%) | 16/175 (9.1%) | OR 0.47<br>(0.19 to 1.16) | 46 fewer per 1.000<br>(from 73 fewer to 13 more) | ⊕○○○<br>VERY LOW | CRITICAL |
|---|-----------------------|------------------------|-------------|----------------------|----------------------|------------------------|---------------|---------------|---------------------------|--------------------------------------------------|------------------|----------|

### Mortality (cause of death-haemorrhage)

|   |                       |                          |             |                      |             |      |              |              |                           |                                                     |                  |          |
|---|-----------------------|--------------------------|-------------|----------------------|-------------|------|--------------|--------------|---------------------------|-----------------------------------------------------|------------------|----------|
| 1 | Observational studies | serious <sup>a,b,e</sup> | not serious | serious <sup>c</sup> | not serious | none | 8/252 (3.2%) | 4/29 (13.8%) | OR 0.22<br>(0.06 to 0.80) | 104 fewer per 1.000<br>(from 128 fewer to 24 fewer) | ⊕○○○<br>VERY LOW | CRITICAL |
|---|-----------------------|--------------------------|-------------|----------------------|-------------|------|--------------|--------------|---------------------------|-----------------------------------------------------|------------------|----------|

### Health related quality of life

|            |   |   |   |   |   |   |   |   |   |   |   |          |
|------------|---|---|---|---|---|---|---|---|---|---|---|----------|
| No studies | - | - | - | - | - | - | - | - | - | - | - | CRITICAL |
|------------|---|---|---|---|---|---|---|---|---|---|---|----------|

### ICU length of stay (assessed with: Days)

|   |                       |                          |             |                      |             |                        |   |   |   |   |   |          |
|---|-----------------------|--------------------------|-------------|----------------------|-------------|------------------------|---|---|---|---|---|----------|
| 1 | Observational studies | serious <sup>a,b,e</sup> | not serious | serious <sup>c</sup> | not serious | suspected <sup>h</sup> | - | - | - | - | - | CRITICAL |
|---|-----------------------|--------------------------|-------------|----------------------|-------------|------------------------|---|---|---|---|---|----------|

### ICU free days (assessed with: Days)

|   |                       |                          |             |                      |             |      |    |    |   |                                             |                  |          |
|---|-----------------------|--------------------------|-------------|----------------------|-------------|------|----|----|---|---------------------------------------------|------------------|----------|
| 1 | Observational studies | serious <sup>a,b,e</sup> | not serious | serious <sup>c</sup> | not serious | none | 69 | 69 | - | MD 0.9 lower<br>(2.71 lower to 0.91 higher) | ⊕○○○<br>VERY LOW | CRITICAL |
|---|-----------------------|--------------------------|-------------|----------------------|-------------|------|----|----|---|---------------------------------------------|------------------|----------|

### Blood product use - 1) PRBC

| Certainty assessment |                       |                          |                           |                      |                      |                        | No of patients |                                | Effect            |                                            | Certainty        | Importance |
|----------------------|-----------------------|--------------------------|---------------------------|----------------------|----------------------|------------------------|----------------|--------------------------------|-------------------|--------------------------------------------|------------------|------------|
| No of studies        | Study design          | Risk of bias             | Inconsistency             | Indirectness         | Imprecision          | Other considerations   | Tourniquets    | no tourniquets (adjusted data) | Relative (95% CI) | Absolute (95% CI)                          |                  |            |
| 2                    | Observational studies | serious <sup>a,b,e</sup> | very serious <sup>f</sup> | serious <sup>c</sup> | serious <sup>g</sup> | suspected <sup>h</sup> | 196            | 146                            | -                 | MD 3.28 lower (11.22 lower to 4.66 higher) | ⊕○○○<br>VERY LOW | CRITICAL   |

#### Blood product use - 2) Platelets

|            |   |   |   |   |   |   |   |   |   |   |   |          |
|------------|---|---|---|---|---|---|---|---|---|---|---|----------|
| No studies | - | - | - | - | - | - | - | - | - | - | - | CRITICAL |
|------------|---|---|---|---|---|---|---|---|---|---|---|----------|

#### Blood product use - 3) Plasma

|   |                       |                          |             |                      |             |                        |     |    |   |                                         |                  |          |
|---|-----------------------|--------------------------|-------------|----------------------|-------------|------------------------|-----|----|---|-----------------------------------------|------------------|----------|
| 1 | Observational studies | serious <sup>a,b,e</sup> | not serious | serious <sup>c</sup> | not serious | suspected <sup>h</sup> | 127 | 77 | - | MD 4.8 lower (5.61 lower to 3.99 lower) | ⊕○○○<br>VERY LOW | CRITICAL |
|---|-----------------------|--------------------------|-------------|----------------------|-------------|------------------------|-----|----|---|-----------------------------------------|------------------|----------|

#### Blood product use -4) Cryoprecipitate

|            |   |   |   |   |   |   |   |   |   |   |   |          |
|------------|---|---|---|---|---|---|---|---|---|---|---|----------|
| No studies | - | - | - | - | - | - | - | - | - | - | - | CRITICAL |
|------------|---|---|---|---|---|---|---|---|---|---|---|----------|

#### Adverse events - 1.1) initial amputation

|   |                       |                        |             |                      |             |      |               |             |                         |                                               |                  |          |
|---|-----------------------|------------------------|-------------|----------------------|-------------|------|---------------|-------------|-------------------------|-----------------------------------------------|------------------|----------|
| 1 | Observational studies | serious <sup>b,e</sup> | not serious | serious <sup>c</sup> | not serious | none | 16/69 (23.2%) | 4/69 (5.8%) | OR 4.91 (1.55 to 15.56) | 174 more per 1.000 (from 29 more to 431 more) | ⊕○○○<br>VERY LOW | CRITICAL |
|---|-----------------------|------------------------|-------------|----------------------|-------------|------|---------------|-------------|-------------------------|-----------------------------------------------|------------------|----------|

#### Adverse events - 1.2) delayed amputation

|   |                       |                          |             |                      |                        |                        |              |               |                         |                                                |                  |          |
|---|-----------------------|--------------------------|-------------|----------------------|------------------------|------------------------|--------------|---------------|-------------------------|------------------------------------------------|------------------|----------|
| 2 | Observational studies | serious <sup>a,b,e</sup> | not serious | serious <sup>c</sup> | serious <sup>d,g</sup> | suspected <sup>h</sup> | 7/180 (3.9%) | 10/130 (7.7%) | OR 0.45 (0.02 to 11.28) | 41 fewer per 1.000 (from 75 fewer to 408 more) | ⊕○○○<br>VERY LOW | CRITICAL |
|---|-----------------------|--------------------------|-------------|----------------------|------------------------|------------------------|--------------|---------------|-------------------------|------------------------------------------------|------------------|----------|

#### Adverse events - 2) nerve palsy

|   |                       |                        |             |                      |             |      |              |             |                         |                                               |                  |          |
|---|-----------------------|------------------------|-------------|----------------------|-------------|------|--------------|-------------|-------------------------|-----------------------------------------------|------------------|----------|
| 1 | Observational studies | serious <sup>b,e</sup> | not serious | serious <sup>c</sup> | not serious | none | 8/127 (6.3%) | 2/77 (2.6%) | OR 2.52 (0.52 to 12.20) | 37 more per 1.000 (from 12 fewer to 219 more) | ⊕○○○<br>VERY LOW | CRITICAL |
|---|-----------------------|------------------------|-------------|----------------------|-------------|------|--------------|-------------|-------------------------|-----------------------------------------------|------------------|----------|

| Certainty assessment |              |              |               |              |             |                      | Nº of patients |                                | Effect            |                   | Certainty | Importance |
|----------------------|--------------|--------------|---------------|--------------|-------------|----------------------|----------------|--------------------------------|-------------------|-------------------|-----------|------------|
| Nº of studies        | Study design | Risk of bias | Inconsistency | Indirectness | Imprecision | Other considerations | Tourniquets    | no tourniquets (adjusted data) | Relative (95% CI) | Absolute (95% CI) |           |            |

#### Adverse events - 3) renal failure

|   |                       |                          |             |                      |             |      |             |             |                           |                                                   |                                                                                              |          |
|---|-----------------------|--------------------------|-------------|----------------------|-------------|------|-------------|-------------|---------------------------|---------------------------------------------------|----------------------------------------------------------------------------------------------|----------|
| 1 | Observational studies | serious <sup>a,b,e</sup> | not serious | serious <sup>c</sup> | not serious | none | 4/69 (5.8%) | 6/69 (8.7%) | OR 0.65<br>(0.17 to 2.44) | 29 fewer per 1.000<br>(from 71 fewer to 102 more) |  VERY LOW | CRITICAL |
|---|-----------------------|--------------------------|-------------|----------------------|-------------|------|-------------|-------------|---------------------------|---------------------------------------------------|----------------------------------------------------------------------------------------------|----------|

| Certainty assessment |              |              |               |              |             |                      | Nº of patients |                                | Effect            |                   | Certainty | Importance |
|----------------------|--------------|--------------|---------------|--------------|-------------|----------------------|----------------|--------------------------------|-------------------|-------------------|-----------|------------|
| Nº of studies        | Study design | Risk of bias | Inconsistency | Indirectness | Imprecision | Other considerations | Tourniquets    | no tourniquets (adjusted data) | Relative (95% CI) | Absolute (95% CI) |           |            |

#### adverse events - 4) increased bleeding: procedure to control bleeding

|   |                       |                        |             |                      |             |      |                |               |                           |                                                     |                                                                                              |          |
|---|-----------------------|------------------------|-------------|----------------------|-------------|------|----------------|---------------|---------------------------|-----------------------------------------------------|----------------------------------------------------------------------------------------------|----------|
| 1 | Observational studies | serious <sup>a,c</sup> | not serious | serious <sup>b</sup> | not serious | none | 27/127 (21.3%) | 32/77 (41.6%) | OR 0.38<br>(0.20 to 0.72) | 203 fewer per 1.000<br>(from 291 fewer to 77 fewer) |  VERY LOW | CRITICAL |
|---|-----------------------|------------------------|-------------|----------------------|-------------|------|----------------|---------------|---------------------------|-----------------------------------------------------|----------------------------------------------------------------------------------------------|----------|

#### Time to definitive control of haemorrhage

|            |  |  |  |  |  |  |  |  |               |  |   |           |
|------------|--|--|--|--|--|--|--|--|---------------|--|---|-----------|
| No studies |  |  |  |  |  |  |  |  | not estimable |  | - | IMPORTANT |
|------------|--|--|--|--|--|--|--|--|---------------|--|---|-----------|

#### Patient-reported outcomes (psychological wellbeing)

|            |  |  |  |  |  |  |  |  |               |  |   |           |
|------------|--|--|--|--|--|--|--|--|---------------|--|---|-----------|
| No studies |  |  |  |  |  |  |  |  | not estimable |  | - | IMPORTANT |
|------------|--|--|--|--|--|--|--|--|---------------|--|---|-----------|

\*the absolute effect comes from crude estimate whereas the relative effect comes from adjusted estimate

CI: Confidence interval; OR: Odds ratio; MD: Mean difference

## Explanations

- a. Representativeness of the exposed cohort
- b. Adequacy of follow up of cohorts
- c. USA setting
- d. number of events <200
- e. Demonstration that outcome of interest was not present at start of study
- f. I2>75%
- g. Confidence intervals crossed the line of no difference with plausible effects in favor to the experimental group
- h. we did not considered one study for unclear reporting outcome data
